# Supplementary material
Source: Research Square preprint supplement (doi:10.21203/rs.3.rs-10342326/v1)
Supplement: Supplementary file 1 [file 414ce56ed50e2763f288215f.docx]

Table 1: Formulas used to derive the morphometric parameters of the Watersheds

| S. No. | Morphometric Parameter | Formula | References |
| --- | --- | --- | --- |
|  | **Linear Aspects** |  |  |
|  | Stream Order (*u*) | Drainage Hierarchy Rank | Strahler (1964) |
|  | Stream Number (*Nu*) | Total number of stream segments in the order ‘*u*’ | Horton (1945) |
|  | Stream Length (*Lu*) | Hydrographic length | Horton (1945) |
|  | Stream Length Ratio (*Rl*) | *Rl*= *Lu / L(u-1)*  *Lu* = cumulative length of stream segments of a given order and *Nu* =total stream segment frequency for order *‘u’*  *L(u-1) =* cumulative length of the stream segments of one order less to the given order *‘u’* | Horton (1945) |
|  | Mean Stream Length (*Rim*) | *Rlm* = *∑Lu /Nu*  *Lu* = cumulative length of stream segments of a given order and *Nu* =total stream segments frequency for order *‘u’*  *Nu =* total number of drainage segment of order *‘u’* | Horton (1932) |
|  | Bifurcation Ratio (*Rb*) | *Rb* = *Nu / N(u+1)*  *Nu =* total number of stream segments of order *‘u’*  *N(u+1)=* total number of stream segments of next higher order *‘u’* | Schumm (1956) |
|  | Mean Bifurcation ratio (*Rbm*) | *Rbm*= average of bifurcation ratios of all orders | Strahler (1957) |
|  | Basin Length (*Lb*) | *1.312*A0.568*  *A* = area of the basin (*km2*) | Nookaratnam et al. (2005) |
|  | Drainage Density (*Dd*) | *Dd* = (∑*Lu)/A* | Horton (1932) |
|  | Drainage Intensity(*Di*) | *Di* = Stream Frequency/ Drainage density | Faniran (1968) |
|  | Length of overland flow (*Lo*) | *Lo =1/(2Dd)* | Horton (1945) |
|  | Stream Frequency (*Fs*) | *Fs* = (∑*Nu*)/*A* | Schumm (1956) |
|  | Constant channel maintenance (*Ccm*) | *Ccm*= 1/*Dd* | Schumm (1956) |
|  | Drainage Texture (*Dt*) | *Dt* = (∑*Nu*)/*P*  *P* = Perimeter of the basin | Schumn(1956) |
|  | Infiltration number (*If*) | *If = Fs ×Dd* | Faniran (1968) |
|  | Rho Coefficient (*ρ*) | *ρ = Lsm /*Rbm | Horton (1945) |
|  | **Relief Aspects** |  |  |
|  | Basin Relief (*Bh*) | *Bh = H-h* | Strahler (1952) |
|  | Relative relief (*Rhp*) | *Rhp*= *H/L****b*** | Schumm (1957) |
|  | Maximum Elevation (*H*) | Elevation of basin through satellite data |  |
|  | Minimum Elevation (*h*) | Elevation of basin through satellite data |  |
|  | Ruggedness number (*Rn*) | *Rn = Bh × Dd* | Strahler (1954) |
|  | **Areal Aspects** |  |  |
|  | Area of the basin (*A*) | *Through satellite data* |  |
|  | Perimeter of the basin (*P*) | *Through satellite data* |  |
|  | Form factor (*Ff*) | *Ff = A/Lb2* | Horton (1932) |
|  | Circulatory Ratio (*Rc*) | *Rc 4πA/P2 , π=3.14* | Miller (1953) |
|  | Compactness coefficient (*Cc*) | *Cc =P/2(πA)0.5* | Horton (1945) |
|  | Elongation ratio (*Rc*) | *Rc =(2*(A/π)0.5)/ Lb* | Schumm (1956) |
|  | Lemniscate ratio (*K*) | *K = Lb2/4A)* | Chorely (1957) |
|  | Shape index (*Sb*) | *Sb =1/Ff* | Horton (1932) |
|  | **Hypsometric Analysis** |  |  |
|  | Elevation-to-relief ratio (*E*) | *E=(Mean elevation-Minimum elevation/ Maximum elevation- Minimum elevation)* | Pike and Wilson (1971) |

**Table 2: Results of the morphometric parameters of the Sub-watershed**

| Sub Watersheds | Area  (km) | Perimeter  (km) | Total no. of streams | Stream length (km) | Basin length (km) | Basin Relief (m) | Elevation (m) | | |
| --- | --- | --- | --- | --- | --- | --- | --- | --- | --- |
| **maximum** | **minimum** | **mean** |
| SW1 | 1184.06 | 219.08 | 107 | 519.53 | 73.05 | 307.76 | 374.76 | 67.00 | 171.48 |
| SW2 | 1575.27 | 328.72 | 138 | 519.53 | 85.91 | 575.16 | 642.17 | 67.00 | 327.99 |
| SW3 | 2142.21 | 291.73 | 177 | 1027.86 | 102.30 | 573.20 | 638.22 | 65.03 | 221.65 |
| SW4 | 1033.42 | 276.42 | 86 | 541.18 | 67.62 | 439.12 | 496.12 | 57.00 | 102.37 |
| SW5 | 1280.36 | 220.68 | 98 | 685.21 | 76.37 | 176.93 | 232.50 | 55.58 | 82.39 |
| SW6 | 804.51 | 330.76 | 72 | 388.28 | 58.66 | 235.07 | 287.57 | 52.50 | 72.45 |

**Table 3: Results of Linear Morphometric parameters of the Sub-watershed**

| Sub Watersheds | Drainage amount in each order (Nu) | | | | | | | Drainage length in each order (Lu) in km | | | | | | |
| --- | --- | --- | --- | --- | --- | --- | --- | --- | --- | --- | --- | --- | --- | --- |
| **1st** | **2nd** | **3rd** | **4th** | **5th** | **6th** | **Total** | **1st** | **2nd** | **3rd** | **4th** | **5th** | **6th** | **Total** |
| SW-1 | 87 | 16 | 3 | 1 | Nil | Nil | 107 | 248.09 | 118.79 | 131.08 | 21.57 | Nil | Nil | 519.53 |
| SW-2 | 112 | 21 | 4 | 1 | Nil | Nil | 138 | 300.56 | 137.89 | 59.92 | 119.96 | Nil | Nil | 618.33 |
| SW-3 | 136 | 30 | 7 | 3 | 1 | Nil | 177 | 518.43 | 248.20 | 150.02 | 104.40 | 6.81 | Nil | 1027.86 |
| SW-4 | 66 | 15 | 3 | 1 | 1 | Nil | 86 | 267.67 | 133.18 | 32.48 | 62.32 | 45.53 | Nil | 541.18 |
| SW-5 | 76 | 18 | 3 | 1 | Nil | Nil | 98 | 373.61 | 168.20 | 117.74 | 25.67 | Nil | Nil | 685.21 |
| SW-6 | 52 | 12 | 2 | 3 | 2 | 1 | 72 | 178.52 | 68.84 | 18.42 | 0.86 | 69.62 | 52.02 | 388.28 |

**Table 4: Computed Morphometric Parameters for Individual Sub-Watersheds (SW1–SW6).**

|  | Dd | Di | Rbm | Lo | Rlm | Fs | Ccm | Dt | If | Rho | Sb | Bh | Rh | Rn | DI | Ff | Rc | Cc | Re | K | SB | HI |
| --- | --- | --- | --- | --- | --- | --- | --- | --- | --- | --- | --- | --- | --- | --- | --- | --- | --- | --- | --- | --- | --- | --- |
| SW1 | 0.439 | 0.206 | 4.590 | 0.755 | 2.994 | 0.090 | 2.279 | 0.488 | 0.040 | 0.652 | 1.228 | 0.308 | 4.213 | 0.135 | 0.821 | 0.222 | 0.310 | 1.796 | 0.532 | 1.126 | 4.507 | 0.339 |
| SW2 | 0.393 | 0.223 | 4.861 | 0.798 | 4.245 | 0.088 | 2.548 | 0.420 | 0.034 | 0.873 | 1.784 | 0.575 | 6.695 | 0.226 | 0.896 | 0.213 | 0.183 | 2.336 | 0.521 | 1.171 | 4.685 | 0.454 |
| SW3 | 0.480 | 0.172 | 3.538 | 0.722 | 1.645 | 0.083 | 2.084 | 0.607 | 0.040 | 0.465 | 1.237 | 0.573 | 5.603 | 0.275 | 0.898 | 0.205 | 0.316 | 1.778 | 0.511 | 1.221 | 4.885 | 0.273 |
| SW4 | 0.524 | 0.159 | 3.350 | 0.691 | 2.474 | 0.083 | 1.910 | 0.311 | 0.044 | 0.738 | 1.492 | 0.439 | 6.494 | 0.230 | 0.885 | 0.226 | 0.170 | 2.426 | 0.536 | 1.105 | 4.424 | 0.103 |
| SW5 | 0.535 | 0.143 | 4.407 | 0.686 | 2.252 | 0.077 | 1.869 | 0.444 | 0.041 | 0.511 | 1.328 | 0.177 | 2.317 | 0.095 | 0.761 | 0.220 | 0.330 | 1.740 | 0.529 | 1.138 | 4.555 | 0.152 |
| SW6 | 0.483 | 0.185 | 2.900 | 0.720 | 25.160 | 0.089 | 2.072 | 0.218 | 0.043 | 8.676 | 2.554 | 0.235 | 4.008 | 0.113 | 0.817 | 0.234 | 0.092 | 3.290 | 0.546 | 1.068 | 4.276 | 0.085 |

**Table 5: Sub-watershed prioritization based on WSA, SPR, and AHP-TOPSIS models**

| SW | WSA Score (CF) | WSA Rank | WSA Priority | SPR Value | SPR Rank | SPR Priority | TOPSIS Cl+ | TOPSIS Rank | TOPSIS Priority |
| --- | --- | --- | --- | --- | --- | --- | --- | --- | --- |
| SW-1 | 3.198 | 6 | L | 0.3 | 3 | M | 0.534 | 3 | H |
| SW-2 | 2.489 | 4 | M | 0.004 | 4 | M | 0.648 | 2 | H |
| SW-3 | 1.909 | 2 | H | 0.33 | 2 | H | 0.755 | 1 | VH |
| SW-4 | 1.682 | 1 | VH | 0.0013 | 5 |  | 0.423 | 4 | M |
| SW-5 | 2.347 | 3 | H | 0.5 | 1 | VH | 0.363 | 5 | M |
| SW-6 | 2.668 | 5 | M | 0.0000035 | 6 | L | 0.227 | 6 | L |

Note: VH = Very High; H = High; M = Moderate; L = Low

**Table 6: Sediment Production Rate (SPR)**

| Sub-Watersheds | Ff | Rc | Cc | SPR( ha-m/100 Sq km/year | Ranking | Priority Class |
| --- | --- | --- | --- | --- | --- | --- |
| WS-1 | 0.222 | 0.310 | 1.796 | 0.3 | 3 | medium |
| WS-2 | 0.213 | 0.183 | 2.336 | 0.004 | 4 | low |
| WS-3 | 0.205 | 0.316 | 1.778 | 0.33 | 2 | high |
| WS-4 | 0.226 | 0.170 | 2.426 | 0.0013 | 5 | very low |
| WS-5 | 0.220 | 0.330 | 1.740 | 0.5 | 1 | very high |
| WS-6 | 0.234 | 0.092 | 3.290 | 0.0000035 | 6 | very low |

**Table 7: Model comparison based on morphometric parameters.**

| Model Comparison | AHP–TOPSIS vs WSA | AHP–TOPSIS vs SPR | WSA vs SPR |
| --- | --- | --- | --- |
| SCCT (ρ) | 0.2 | 0.37 | 0.14 |
| KTCCT (τ) | 0.2 | 0.33 | 0.07 |
| Strength of Agreement | Weak–Moderate | Moderate | Very Weak |
| Best Model | AHP-TOPSIS | AHP-TOPSIS | - |

**Table 8: Conservation and management recommendations**

| **Priority Class** | **Sub-watersheds** | **Area (%)** | **Key Issues** | **Recommended Measures** |
| --- | --- | --- | --- | --- |
| **Very High** | SW-3, SW-5 | 42.67 % | Active gully erosion, high runoff, and plateau scarps | Gully control measures; Contour embankments; check dams; Afforestation of degraded hill slopes; Eco-engineering measures for slope protection. |
| **High** | SW-1, SW-2 | 34.40 % | Microchannel erosion; seasonal gullying; sheet erosion | Grass-lined runoff channels; Stone revetment protection; Integrated tree–crop cultivation |
| **Moderate** | SW-4 | 12.89 % | Moderate sheet erosion; seasonal flooding | Conservation tillage; bench terracing; riparian buffer strips along stream banks; Public awareness and capacity-building programs |
| **Low** | SW-6 | 10.03 % | Minimal erosion; alluvial plain floodplain | Integrated floodplain management; Riparian zone rehabilitation; Aquifer recharge systems; Enhanced surface drainage systems. |
