# Supplementary material
Source: Research Square preprint supplement (doi:10.21203/rs.3.rs-10342326/v1)
Supplement: Supplementary file 2 [file 620d79364f6d529344f9c4c8.docx]

**Supplementary Tables**

**Table S1: Drainage length ratio and Mean Drainage length**

| Sub Watersheds | Stream Length Ratio (*Rl*) | | | | | Mean | Mean Stream Length (R*sm*) | | | | | | Mean |
| --- | --- | --- | --- | --- | --- | --- | --- | --- | --- | --- | --- | --- | --- |
|  | 2/1 | 3/2 | 4/3 | 5/4 | 6/5 |  | 1 | 2 | 3 | 4 | 5 | 6 |  |
| SW-1 | 2.60 | 5.89 | 0.49 | - | - | 2.99 | 2.85 | 7.42 | 43.69 | 21.57 | - | - | 18.89 |
| SW-2 | 2.45 | 2.28 | 8.01 | - | - | 4.25 | 2.68 | 6.57 | 14.98 | 119.96 | - | - | 36.05 |
| SW-3 | 2.17 | 2.59 | 1.62 | 0.20 | - | 1.65 | 3.81 | 8.27 | 21.43 | 34.80 | 6.81 | - | 15.03 |
| SW-4 | 2.19 | 1.22 | 5.76 | 0.73 | - | 2.47 | 4.06 | 8.88 | 10.83 | 62.32 | 45.53 | - | 26.32 |
| SW-5 | 1.90 | 4.20 | 0.65 | - | - | 2.25 | 4.92 | 9.34 | 39.25 | 25.67 | - | - | 19.79 |
| SW-6 | 1.67 | 1.61 | 0.03 | 121.00 | 1.49 | 25.16 | 3.43 | 5.74 | 9.21 | 0.29 | 34.81 | 52.02 | 17.58 |

**Table S2: Correlation Matrix**

|  | **Dd** | **Di** | **Rbm** | **Lo** | **Rlm** | **Fs** | **Ccm** | **Dt** | **If** | **P** | **Sb** | **Bh** | **Rh** | **Rn** | **Din** | **Ff** | **Rc** | **Cc** | **Re** | **K** | **Sb** | **E** |
| --- | --- | --- | --- | --- | --- | --- | --- | --- | --- | --- | --- | --- | --- | --- | --- | --- | --- | --- | --- | --- | --- | --- |
| **Dd** | 1.000 | -0.978 | -0.526 | -0.997 | -0.008 | -0.707 | -0.995 | -0.192 | 0.824 | 0.039 | -0.131 | -0.505 | -0.455 | -0.249 | -0.432 | 0.287 | 0.131 | -0.044 | 0.286 | -0.285 | -0.283 | -0.878 |
| **Di** | -0.978 | 1.000 | 0.422 | 0.967 | 0.141 | 0.831 | 0.966 | 0.033 | -0.696 | 0.095 | 0.245 | 0.412 | 0.444 | 0.165 | 0.395 | -0.099 | -0.262 | 0.186 | -0.099 | 0.099 | 0.097 | 0.777 |
| **Rbm** | -0.526 | 0.422 | 1.000 | 0.577 | -0.593 | -0.036 | 0.573 | 0.477 | -0.784 | -0.636 | -0.491 | 0.113 | -0.045 | -0.088 | -0.112 | -0.425 | 0.516 | -0.614 | -0.417 | 0.391 | 0.390 | 0.782 |
| **Lo** | -0.997 | 0.967 | 0.577 | 1.000 | -0.026 | 0.662 | 1.000 | 0.188 | -0.856 | -0.075 | 0.117 | 0.500 | 0.450 | 0.237 | 0.415 | -0.297 | -0.121 | 0.024 | -0.295 | 0.292 | 0.290 | 0.893 |
| **Rlm** | -0.008 | 0.141 | -0.593 | -0.026 | 1.000 | 0.474 | -0.028 | -0.732 | 0.371 | 0.998 | 0.940 | -0.407 | -0.221 | -0.437 | -0.238 | 0.686 | -0.738 | 0.888 | 0.680 | -0.658 | -0.659 | -0.440 |
| **Fs** | -0.707 | 0.831 | -0.036 | 0.662 | 0.474 | 1.000 | 0.658 | -0.281 | -0.182 | 0.448 | 0.461 | 0.140 | 0.326 | -0.007 | 0.272 | 0.322 | -0.489 | 0.484 | 0.320 | -0.311 | -0.313 | 0.342 |
| **Ccm** | -0.995 | 0.966 | 0.573 | 1.000 | -0.028 | 0.658 | 1.000 | 0.180 | -0.857 | -0.078 | 0.121 | 0.511 | 0.465 | 0.248 | 0.427 | -0.296 | -0.133 | 0.032 | -0.294 | 0.291 | 0.289 | 0.891 |
| **Dt** | -0.192 | 0.033 | 0.477 | 0.188 | -0.732 | -0.281 | 0.180 | 1.000 | -0.483 | -0.729 | -0.809 | 0.423 | 0.025 | 0.409 | 0.199 | -0.902 | 0.872 | -0.884 | -0.901 | 0.896 | 0.897 | 0.571 |
| **If** | 0.824 | -0.696 | -0.784 | -0.856 | 0.371 | -0.182 | -0.857 | -0.483 | 1.000 | 0.416 | 0.191 | -0.559 | -0.346 | -0.316 | -0.349 | 0.638 | -0.219 | 0.333 | 0.635 | -0.625 | -0.623 | -0.948 |
| **P** | 0.039 | 0.095 | -0.636 | -0.075 | 0.998 | 0.448 | -0.078 | -0.729 | 0.416 | 1.000 | 0.928 | -0.413 | -0.228 | -0.426 | -0.237 | 0.688 | -0.730 | 0.884 | 0.681 | -0.659 | -0.659 | -0.482 |
| **Sb** | -0.131 | 0.245 | -0.491 | 0.117 | 0.940 | 0.461 | 0.121 | -0.809 | 0.191 | 0.928 | 1.000 | -0.222 | 0.002 | -0.292 | -0.063 | 0.635 | -0.883 | 0.959 | 0.630 | -0.612 | -0.612 | -0.318 |
| **Bh** | -0.505 | 0.412 | 0.113 | 0.500 | -0.407 | 0.140 | 0.511 | 0.423 | -0.559 | -0.413 | -0.222 | 1.000 | 0.891 | 0.957 | 0.955 | -0.687 | -0.028 | -0.151 | -0.689 | 0.694 | 0.694 | 0.587 |
| **Rh** | -0.455 | 0.444 | -0.045 | 0.450 | -0.221 | 0.326 | 0.465 | 0.025 | -0.346 | -0.228 | 0.002 | 0.891 | 1.000 | 0.865 | 0.964 | -0.299 | -0.374 | 0.159 | -0.300 | 0.303 | 0.303 | 0.395 |
| **Rn** | -0.249 | 0.165 | -0.088 | 0.237 | -0.437 | -0.007 | 0.248 | 0.409 | -0.316 | -0.426 | -0.292 | 0.957 | 0.865 | 1.000 | 0.949 | -0.649 | 0.002 | -0.169 | -0.652 | 0.659 | 0.660 | 0.360 |
| **Din** | -0.432 | 0.395 | -0.112 | 0.415 | -0.238 | 0.272 | 0.427 | 0.199 | -0.349 | -0.237 | -0.063 | 0.955 | 0.964 | 0.949 | 1.000 | -0.461 | -0.248 | 0.069 | -0.464 | 0.473 | 0.473 | 0.407 |
| **Ff** | 0.287 | -0.099 | -0.425 | -0.297 | 0.686 | 0.322 | -0.296 | -0.902 | 0.638 | 0.688 | 0.635 | -0.687 | -0.299 | -0.649 | -0.461 | 1.000 | -0.638 | 0.709 | 1.000 | -0.999 | -0.999 | -0.631 |
| **Rc** | 0.131 | -0.262 | 0.516 | -0.121 | -0.738 | -0.489 | -0.133 | 0.872 | -0.219 | -0.730 | -0.883 | -0.028 | -0.374 | 0.002 | -0.248 | -0.638 | 1.000 | -0.964 | -0.634 | 0.621 | 0.622 | 0.300 |
| **Cc** | -0.044 | 0.186 | -0.614 | 0.024 | 0.888 | 0.484 | 0.032 | -0.884 | 0.333 | 0.884 | 0.959 | -0.151 | 0.159 | -0.169 | 0.069 | 0.709 | -0.964 | 1.000 | 0.703 | -0.686 | -0.686 | -0.417 |
| **Re** | 0.286 | -0.099 | -0.417 | -0.295 | 0.680 | 0.320 | -0.294 | -0.901 | 0.635 | 0.681 | 0.630 | -0.689 | -0.300 | -0.652 | -0.464 | 1.000 | -0.634 | 0.703 | 1.000 | -0.999 | -0.999 | -0.627 |
| **K** | -0.285 | 0.099 | 0.391 | 0.292 | -0.658 | -0.311 | 0.291 | 0.896 | -0.625 | -0.659 | -0.612 | 0.694 | 0.303 | 0.659 | 0.473 | -0.999 | 0.621 | -0.686 | -0.999 | 1.000 | 1.000 | 0.617 |
| **Sb** | -0.283 | 0.097 | 0.390 | 0.290 | -0.659 | -0.313 | 0.289 | 0.897 | -0.623 | -0.659 | -0.612 | 0.694 | 0.303 | 0.660 | 0.473 | -0.999 | 0.622 | -0.686 | -0.999 | 1.000 | 1.000 | 0.616 |
| **E** | -0.878 | 0.777 | 0.782 | 0.893 | -0.440 | 0.342 | 0.891 | 0.571 | -0.948 | -0.482 | -0.318 | 0.587 | 0.395 | 0.360 | 0.407 | -0.631 | 0.300 | -0.417 | -0.627 | 0.617 | 0.616 | 1.000 |

**Table S3: Computed Weighted Sum Analysis**

| **Sub-WS** | **Dd** | **Fs** | **Rbm** | **Lo** | **Bh** | **Rh** | **Rn** | **Re** | **Rc** | **HI** | **Di** | **Dt** | **Cc** | **K** | **Sum** | **Ranking** |
| --- | --- | --- | --- | --- | --- | --- | --- | --- | --- | --- | --- | --- | --- | --- | --- | --- |
| **SW-1** | 0.845 | 0.061 | 0.191 | 0.044 | 0.358 | 0.243 | 0.369 | 0.064 | 0.059 | 0.179 | 0.303 | 0.331 | 0.079 | 0.071 | 3.198 | 1 |
| **SW-2** | 0.845 | 0.122 | 0.096 | 0.022 | 0.090 | 0.061 | 0.277 | 0.086 | 0.059 | 0.090 | 0.152 | 0.497 | 0.059 | 0.035 | 2.489 | 3 |
| **SW-3** | 0.676 | 0.184 | 0.191 | 0.022 | 0.090 | 0.121 | 0.092 | 0.086 | 0.039 | 0.090 | 0.076 | 0.166 | 0.059 | 0.018 | 1.909 | 5 |
| **SW-4** | 0.338 | 0.122 | 0.191 | 0.044 | 0.090 | 0.061 | 0.092 | 0.043 | 0.039 | 0.179 | 0.076 | 0.331 | 0.039 | 0.035 | 1.682 | 6 |
| **SW-5** | 0.338 | 0.184 | 0.096 | 0.067 | 0.269 | 0.182 | 0.277 | 0.064 | 0.039 | 0.179 | 0.227 | 0.331 | 0.059 | 0.035 | 2.347 | 4 |
| **SW-6** | 0.507 | 0.184 | 0.096 | 0.067 | 0.269 | 0.061 | 0.277 | 0.064 | 0.059 | 0.269 | 0.227 | 0.497 | 0.039 | 0.053 | 2.668 | 2 |

**Table S4: AHP weights for morphometric parameters used in TOPSIS model**

| Parameter | Symbol | AHP Weight | Relationship to erosion | Rank in AHP |
| --- | --- | --- | --- | --- |
| Drainage Density | Dd | 0.1689 | Direct | 1 |
| Drainage Texture Ratio | Dt | 0.1657 | Direct | 2 |
| Mean Bifurcation Ratio | Rbm | 0.0955 | Inverse | 3 |
| Ruggedness number | Rn | 0.0923 | Direct | 4 |
| Basin Relief | Bh | 0.0896 | Direct | 5 |
| Hypsometric Integral | HI | 0.0896 | Direct | 6 |
| Dissection Index | Di | 0.0758 | Direct | 7 |
| Stream Frequency | Fs | 0.0612 | Direct | 8 |
| Relief Ratio | Rh | 0.0607 | Direct | 9 |
| Length of overland flow | Lo | 0.0222 | Inverse | 10 |
| Elongation Ratio | Re | 0.0214 | Inverse | 11 |
| Circulatory Ratio | Rc | 0.0197 | Inverse | 12 |
| Compact Coefficient | Cc | 0.0197 | Direct | 13 |
| Lemniscate Index | K | 0.0177 | Inverse | 14 |

**Table S5: AHP-TOPSIS**

1. **Parameters considered for this model (14 parameters)**

| Sub-WS | Dd | Fs | Rbm | Lo | Bh | Rh | Rn | Re | Rc | HI | Di | Dt | Cc | K |
| --- | --- | --- | --- | --- | --- | --- | --- | --- | --- | --- | --- | --- | --- | --- |
| WS-1 | 0.439 | 0.090 | 4.590 | 0.755 | 0.308 | 4.213 | 0.135 | 0.532 | 0.310 | 0.339 | 0.821 | 0.488 | 1.796 | 1.126 |
| WS-2 | 0.393 | 0.088 | 4.861 | 0.798 | 0.575 | 6.695 | 0.226 | 0.521 | 0.183 | 0.454 | 0.896 | 0.420 | 2.336 | 1.171 |
| WS-3 | 0.480 | 0.083 | 3.538 | 0.722 | 0.573 | 5.603 | 0.275 | 0.511 | 0.316 | 0.273 | 0.898 | 0.607 | 1.778 | 1.221 |
| WS-4 | 0.524 | 0.083 | 3.350 | 0.691 | 0.439 | 6.494 | 0.230 | 0.536 | 0.170 | 0.103 | 0.885 | 0.311 | 2.426 | 1.105 |
| WS-5 | 0.535 | 0.077 | 4.407 | 0.686 | 0.177 | 2.317 | 0.095 | 0.529 | 0.330 | 0.152 | 0.761 | 0.444 | 1.740 | 1.138 |
| WS-6 | 0.483 | 0.089 | 2.900 | 0.720 | 0.235 | 4.008 | 0.113 | 0.546 | 0.092 | 0.085 | 0.817 | 0.218 | 3.290 | 1.068 |

1. **Pairwise Comparison Matrix**

|  | Dd | Fs | Rbm | Lo | Bh | Rh | Rn | Re | Rc | HI | Di | Dt | Cc | K |
| --- | --- | --- | --- | --- | --- | --- | --- | --- | --- | --- | --- | --- | --- | --- |
| Dd | 1 | 3 | 2 | 7 | 3 | 4 | 2 | 6 | 6 | 3 | 2 | 1 | 6 | 7 |
| Fs | 1/3 | 1 | 1/2 | 3 | 1/2 | 1 | 1/2 | 3 | 4 | 1/2 | 1 | 1/3 | 4 | 5 |
| Rbm | 1/2 | 2 | 1 | 5 | 1 | 2 | 1 | 5 | 5 | 1 | 1 | 1/2 | 5 | 6 |
| Lo | 1/7 | 1/3 | 1/5 | 1 | 1/5 | 1/4 | 1/4 | 1 | 1 | 1/4 | 1/2 | 1/5 | 1 | 1 |
| Bh | 1/3 | 2 | 1 | 5 | 1 | 2 | 1 | 4 | 5 | 1 | 1 | 1/3 | 5 | 6 |
| Rh | 1/4 | 1 | 1/2 | 4 | 1/2 | 1 | 1/2 | 3 | 4 | 1/2 | 1 | 1/4 | 4 | 5 |
| Rn | 1/2 | 2 | 1 | 4 | 1 | 2 | 1 | 4 | 5 | 1 | 1 | 1/2 | 5 | 6 |
| Re | 1/6 | 1/3 | 1/5 | 1 | 1/4 | 1/3 | 1/4 | 1 | 1 | 1/5 | 1/3 | 1/6 | 1 | 1 |
| Rc | 1/6 | 1/4 | 1/5 | 1 | 1/5 | 1/4 | 1/5 | 1 | 1 | 1/5 | 1/4 | 1/6 | 1 | 1 |
| HI | 1/3 | 2 | 1 | 4 | 1 | 2 | 1 | 5 | 5 | 1 | 1 | 1/3 | 5 | 6 |
| Di | 1/2 | 1 | 1 | 2 | 1 | 1 | 1 | 3 | 4 | 1 | 1 | 1/2 | 4 | 5 |
| Dt | 1 | 3 | 2 | 5 | 3 | 4 | 2 | 6 | 6 | 3 | 2 | 1 | 6 | 7 |
| Cc | 1/6 | 1/4 | 1/5 | 1 | 1/5 | 1/4 | 1/5 | 1 | 1 | 1/5 | 1/4 | 1/6 | 1 | 1 |
| K | 1/7 | 1/5 | 1/6 | 1 | 1/6 | 1/5 | 1/6 | 1 | 1 | 1/6 | 1/5 | 1/7 | 1 | 1 |

1. **Column-Wise Normalized Matrix**

|  | Dd | Fs | Rbm | Lo | Bh | Rh | Rn | Re | Rc | HI | Di | Dt | Cc | K | Average |
| --- | --- | --- | --- | --- | --- | --- | --- | --- | --- | --- | --- | --- | --- | --- | --- |
| Dd | 0.181 | 0.163 | 0.182 | 0.159 | 0.230 | 0.197 | 0.181 | 0.136 | 0.122 | 0.230 | 0.160 | 0.179 | 0.122 | 0.121 | 0.169 |
| Fs | 0.060 | 0.054 | 0.046 | 0.068 | 0.038 | 0.049 | 0.045 | 0.068 | 0.082 | 0.038 | 0.080 | 0.060 | 0.082 | 0.086 | 0.061 |
| Rbm | 0.090 | 0.109 | 0.091 | 0.114 | 0.077 | 0.099 | 0.090 | 0.114 | 0.102 | 0.077 | 0.080 | 0.089 | 0.102 | 0.103 | 0.096 |
| Lo | 0.026 | 0.018 | 0.018 | 0.023 | 0.015 | 0.012 | 0.023 | 0.023 | 0.020 | 0.019 | 0.040 | 0.036 | 0.020 | 0.017 | 0.022 |
| Bh | 0.060 | 0.109 | 0.091 | 0.114 | 0.077 | 0.099 | 0.090 | 0.091 | 0.102 | 0.077 | 0.080 | 0.060 | 0.102 | 0.103 | 0.090 |
| Rh | 0.045 | 0.054 | 0.046 | 0.091 | 0.038 | 0.049 | 0.045 | 0.068 | 0.082 | 0.038 | 0.080 | 0.045 | 0.082 | 0.086 | 0.061 |
| Rn | 0.090 | 0.109 | 0.091 | 0.091 | 0.077 | 0.099 | 0.090 | 0.091 | 0.102 | 0.077 | 0.080 | 0.089 | 0.102 | 0.103 | 0.092 |
| Re | 0.030 | 0.018 | 0.018 | 0.023 | 0.019 | 0.016 | 0.023 | 0.023 | 0.020 | 0.015 | 0.027 | 0.030 | 0.020 | 0.017 | 0.021 |
| Rc | 0.030 | 0.014 | 0.018 | 0.023 | 0.015 | 0.012 | 0.018 | 0.023 | 0.020 | 0.015 | 0.020 | 0.030 | 0.020 | 0.017 | 0.020 |
| HI | 0.060 | 0.109 | 0.091 | 0.091 | 0.077 | 0.099 | 0.090 | 0.114 | 0.102 | 0.077 | 0.080 | 0.060 | 0.102 | 0.103 | 0.090 |
| Di | 0.090 | 0.054 | 0.091 | 0.045 | 0.077 | 0.049 | 0.090 | 0.068 | 0.082 | 0.077 | 0.080 | 0.089 | 0.082 | 0.086 | 0.076 |
| Dt | 0.181 | 0.163 | 0.182 | 0.114 | 0.230 | 0.197 | 0.181 | 0.136 | 0.122 | 0.230 | 0.160 | 0.179 | 0.122 | 0.121 | 0.166 |
| Cc | 0.030 | 0.014 | 0.018 | 0.023 | 0.015 | 0.012 | 0.018 | 0.023 | 0.020 | 0.015 | 0.020 | 0.030 | 0.020 | 0.017 | 0.020 |
| K | 0.026 | 0.011 | 0.015 | 0.023 | 0.013 | 0.010 | 0.015 | 0.023 | 0.020 | 0.013 | 0.016 | 0.026 | 0.020 | 0.017 | 0.018 |
| Sum | 1 | 1 | 1 | 1 | 1 | 1 | 1 | 1 | 1 | 1 | 1 | 1 | 1 | 1 | 1 |

1. **Weighted Sum Vector**

|  | Dd | Fs | Rbm | Lo | Bh | Rh | Rn | Re | Rc | HI | Di | Dt | Cc | K | Sum |
| --- | --- | --- | --- | --- | --- | --- | --- | --- | --- | --- | --- | --- | --- | --- | --- |
| Dd | 0.169 | 0.184 | 0.191 | 0.155 | 0.269 | 0.243 | 0.185 | 0.129 | 0.118 | 0.269 | 0.152 | 0.166 | 0.118 | 0.124 | 2.470 |
| Fs | 0.056 | 0.061 | 0.048 | 0.067 | 0.045 | 0.061 | 0.046 | 0.064 | 0.079 | 0.045 | 0.076 | 0.055 | 0.079 | 0.088 | 0.870 |
| Rbm | 0.084 | 0.122 | 0.096 | 0.111 | 0.090 | 0.121 | 0.092 | 0.107 | 0.099 | 0.090 | 0.076 | 0.083 | 0.099 | 0.106 | 1.375 |
| Lo | 0.024 | 0.020 | 0.019 | 0.022 | 0.018 | 0.015 | 0.023 | 0.021 | 0.020 | 0.022 | 0.038 | 0.033 | 0.020 | 0.018 | 0.314 |
| Bh | 0.056 | 0.122 | 0.096 | 0.111 | 0.090 | 0.121 | 0.092 | 0.086 | 0.099 | 0.090 | 0.076 | 0.055 | 0.099 | 0.106 | 1.298 |
| Rh | 0.042 | 0.061 | 0.048 | 0.089 | 0.045 | 0.061 | 0.046 | 0.064 | 0.079 | 0.045 | 0.076 | 0.041 | 0.079 | 0.088 | 0.864 |
| Rn | 0.084 | 0.122 | 0.096 | 0.089 | 0.090 | 0.121 | 0.092 | 0.086 | 0.099 | 0.090 | 0.076 | 0.083 | 0.099 | 0.106 | 1.332 |
| Re | 0.028 | 0.020 | 0.019 | 0.022 | 0.022 | 0.020 | 0.023 | 0.021 | 0.020 | 0.018 | 0.025 | 0.028 | 0.020 | 0.018 | 0.305 |
| Rc | 0.028 | 0.015 | 0.019 | 0.022 | 0.018 | 0.015 | 0.018 | 0.021 | 0.020 | 0.018 | 0.019 | 0.028 | 0.020 | 0.018 | 0.279 |
| HI | 0.056 | 0.122 | 0.096 | 0.089 | 0.090 | 0.121 | 0.092 | 0.107 | 0.099 | 0.090 | 0.076 | 0.055 | 0.099 | 0.106 | 1.297 |
| Di | 0.084 | 0.061 | 0.096 | 0.044 | 0.090 | 0.061 | 0.092 | 0.064 | 0.079 | 0.090 | 0.076 | 0.083 | 0.079 | 0.088 | 1.087 |
| Dt | 0.169 | 0.184 | 0.191 | 0.111 | 0.269 | 0.243 | 0.185 | 0.129 | 0.118 | 0.269 | 0.152 | 0.166 | 0.118 | 0.124 | 2.426 |
| Cc | 0.028 | 0.015 | 0.019 | 0.022 | 0.018 | 0.015 | 0.018 | 0.021 | 0.020 | 0.018 | 0.019 | 0.028 | 0.020 | 0.018 | 0.279 |
| K | 0.024 | 0.012 | 0.016 | 0.022 | 0.015 | 0.012 | 0.015 | 0.021 | 0.020 | 0.015 | 0.015 | 0.024 | 0.020 | 0.018 | 0.249 |

1. **Consistency Vector (λ)**

|  | Aw | W | λ=Aw/W |
| --- | --- | --- | --- |
| Dd | 2.4701644 | 0.1689058 | 14.624 |
| Fs | 0.8698495 | 0.0611994 | 14.213 |
| Rbm | 1.3753622 | 0.0955015 | 14.401 |
| Lo | 0.3140005 | 0.0222034 | 14.142 |
| Bh | 1.2981846 | 0.089599 | 14.489 |
| Rh | 0.8641725 | 0.0606833 | 14.241 |
| Rn | 1.3317421 | 0.0922547 | 14.435 |
| Re | 0.304717 | 0.0214168 | 14.228 |
| Rc | 0.2793509 | 0.0197389 | 14.152 |
| HI | 1.2973981 | 0.089599 | 14.480 |
| Di | 1.086884 | 0.0758264 | 14.334 |
| Dt | 2.4257577 | 0.165659 | 14.643 |
| Cc | 0.2793509 | 0.0197389 | 14.152 |
| K | 0.2492678 | 0.017674 | 14.104 |
|  |  | **Sum** | 200.638 |

**λmax ​= n∑Cvi/n​​**

n=14

CI = λmax−n/n-1CI= 0.0254921

RI= 1.57

CR= CI/RI

CR= **0.016237**

1. **Vector Normalization (Rij)**

| **Sub-WS** | **Dd** | **Fs** | **Rbm** | **Lo** | **Bh** | **Rh** | **Rn** | **Re** | **Rc** | **HI** | **Di** | **Dt** | **Cc** | **K** |
| --- | --- | --- | --- | --- | --- | --- | --- | --- | --- | --- | --- | --- | --- | --- |
| **SW-1** | 0.375 | 0.433 | 0.468 | 0.423 | 0.303 | 0.336 | 0.288 | 0.410 | 0.505 | 0.514 | 0.395 | 0.461 | 0.320 | 0.404 |
| **SW-2** | 0.335 | 0.420 | 0.495 | 0.447 | 0.566 | 0.533 | 0.482 | 0.402 | 0.299 | 0.687 | 0.431 | 0.396 | 0.416 | 0.420 |
| **SW-3** | 0.410 | 0.396 | 0.361 | 0.404 | 0.564 | 0.446 | 0.587 | 0.394 | 0.516 | 0.413 | 0.432 | 0.572 | 0.316 | 0.438 |
| **SW-4** | 0.447 | 0.399 | 0.341 | 0.387 | 0.432 | 0.517 | 0.491 | 0.414 | 0.277 | 0.156 | 0.426 | 0.293 | 0.432 | 0.396 |
| **SW-5** | 0.457 | 0.367 | 0.449 | 0.384 | 0.174 | 0.185 | 0.202 | 0.408 | 0.539 | 0.229 | 0.366 | 0.419 | 0.310 | 0.408 |
| **SW-6** | 0.412 | 0.429 | 0.296 | 0.403 | 0.231 | 0.319 | 0.242 | 0.421 | 0.151 | 0.128 | 0.394 | 0.205 | 0.585 | 0.383 |

1. **Weighted Normalization Matrix (Vij)**

| Sub-WS | Dd | Fs | Rbm | Lo | Bh | Rh | Rn | Re | Rc | HI | Di | Dt | Cc | K |
| --- | --- | --- | --- | --- | --- | --- | --- | --- | --- | --- | --- | --- | --- | --- |
| SW-1 | 0.063 | 0.027 | 0.045 | 0.009 | 0.027 | 0.020 | 0.027 | 0.009 | 0.010 | 0.046 | 0.030 | 0.076 | 0.006 | 0.007 |
| SW-2 | 0.057 | 0.026 | 0.047 | 0.010 | 0.051 | 0.032 | 0.044 | 0.009 | 0.006 | 0.062 | 0.033 | 0.066 | 0.008 | 0.007 |
| SW-3 | 0.069 | 0.024 | 0.034 | 0.009 | 0.051 | 0.027 | 0.054 | 0.008 | 0.010 | 0.037 | 0.033 | 0.095 | 0.006 | 0.008 |
| SW-4 | 0.076 | 0.024 | 0.033 | 0.009 | 0.039 | 0.031 | 0.045 | 0.009 | 0.005 | 0.014 | 0.032 | 0.049 | 0.009 | 0.007 |
| SW-5 | 0.077 | 0.022 | 0.043 | 0.009 | 0.016 | 0.011 | 0.019 | 0.009 | 0.011 | 0.021 | 0.028 | 0.069 | 0.006 | 0.007 |
| SW-6 | 0.070 | 0.026 | 0.028 | 0.009 | 0.021 | 0.019 | 0.022 | 0.009 | 0.003 | 0.012 | 0.030 | 0.034 | 0.012 | 0.007 |
